# Supplementary material for: Dissecting Structural and Functional Diversity of the Lantibiotic Mersacidin
Source: PubMed Central journal article supplement (PMC2706954; doi:10.1016/j.chembiol.2009.03.011), 2009-05-29
Supplement: mmc1.pdf [file mmc1.pdf]

## Supplemental Data

## Dissecting Structural and Functional Diversity

## of the Lantibiotic Mersacidin

Antony N. Appleyard, Shaila Choi, Daniel M. Read, Ann Lightfoot, Steven Boakes, Anja Hoffmann, Ian Chopra, Gabriele Bierbaum, Brian A.M. Rudd, Michael J. Dawson, and Jesus Cortes

Analytical methods for mersacidin and its variants

**Table S1. HPLC Conditions Used in the Analysis of Fermentation Samples and Fermentation Concentrates by LC-MS**

|                |                                                                      |         |         |
|----------------|----------------------------------------------------------------------|---------|---------|
| Column         | Phenomenex Luna HPLC column (5 $\mu$ , C18(C2), 150 $\times$ 4.6 mm) |         |         |
| Mobile Phase A | 10 % Acetonitrile / 0.1 % Formic Acid                                |         |         |
| Mobile Phase B | 90 % Acetonitrile / 0.1 % Formic Acid                                |         |         |
| Flow Rate      | 1 ml/min                                                             |         |         |
| Gradient       | Time 0 minutes                                                       | 100 % A | 0 % B   |
|                | Time 10 minutes                                                      | 0 % A   | 100 % B |
|                | Time 11 minutes                                                      | 0 % A   | 100 % B |
|                | Time 11.1 minutes                                                    | 100 % A | 0 % B   |
|                | Time 15 minutes                                                      | 100 % A | 0 % B   |
|                | Cycle time 15 minutes                                                |         |         |

**Table S2. Mass Spectrometer Parameters Used in the Analysis of Broth Samples and Fermentation Concentrate by LC-MS**

|                     |                       |
|---------------------|-----------------------|
| Ionisation          | Electrospray +ve mode |
| Mass Range          | 250 to 1500 m/z       |
| Capillary Voltage   | 3.10 KV               |
| Cone Voltage        | 40 V                  |
| Skimmer Lens Offset | 5 V                   |
| Ion Energy          | 1.4                   |

**Partial purification of Fermentation Samples for Antibacterial Evaluation**

Prior to bioassay the broth samples and fermentation concentrates, samples were fractionated using an analytical HPLC coupled to a 96 well microtitre plate fraction collector. In general, 0.200 ml of broth sample or fermentation concentrate was loaded onto the column and the components were resolved and collected as described in Table 3. The fractions in the 96 well microtitre plates were evaporated to dryness and the resulting residues were dissolved in 50  $\mu$ l of methanol:water (1:1). For each variant the resuspended residues from fractions 36 to 43 were loaded onto bioassay agar plates containing *Micrococcus luteus* ATCC 4698 as indicator strain. The bioassay plates containing the mersacidin variants samples were left at room temperature for 1 hour to allow diffusion of the sample into the agar prior to incubation at 30  $^{\circ}$ C overnight.

**Table S3. Analytical HPLC Conditions Used to Fractionate Fermentation Samples and Fermentation Concentrates**

|                |                                                                      |
|----------------|----------------------------------------------------------------------|
| Column         | Phenomenex Luna HPLC column (3 $\mu$ , C18(C2), 150 $\times$ 4.6 mm) |
| Mobile Phase A | 30 % Acetonitrile                                                    |
| Mobile Phase B | 65 % Acetonitrile                                                    |

|                     |                       |         |         |
|---------------------|-----------------------|---------|---------|
| Flow Rate           | 1 ml/min              |         |         |
| Gradient            | Time 0 minutes        | 100 % A | 0 % B   |
|                     | Time 10 minutes       | 0 % A   | 100 % B |
|                     | Time 11 minutes       | 0 % A   | 100 % B |
|                     | Time 11.2 minutes     | 100 % A | 0 % B   |
|                     | Time 15 minutes       | 100 % A | 0 % B   |
|                     | Cycle time 15 minutes |         |         |
| Injection Volume    | 200 µl                |         |         |
| Detection           | 254 and 210 nm        |         |         |
| Fraction Collection | 0.2 min/fraction      |         |         |
| Fractions Collected | 60 fractions          |         |         |
